# Supplementary material
Source: publisher figshare collection journal article supplement (https://acs.figshare.com/ndownloader/files/4606123)
Supplement: Supplementary file 1 [file 4606123]

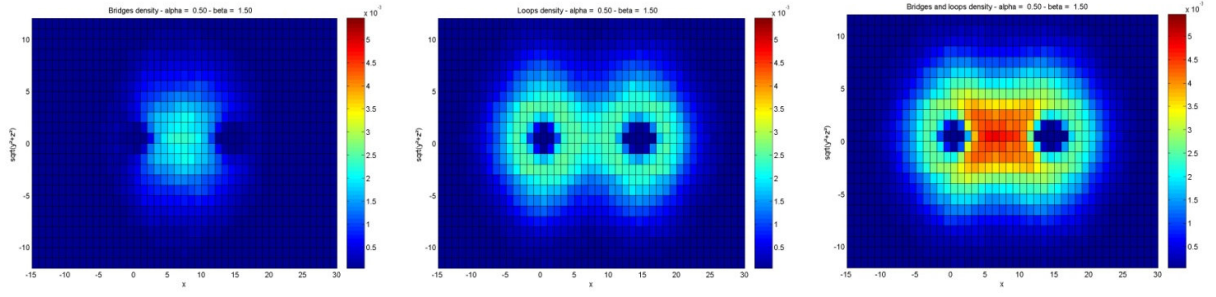

*Bridges, loops, bridges and loops for  $\beta=1.5$*

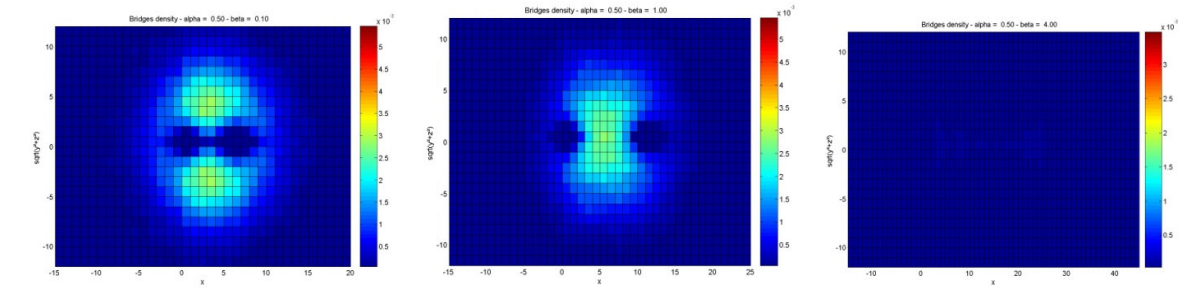

*Bridges for  $\beta = \{0.1; 1; 4\}$*

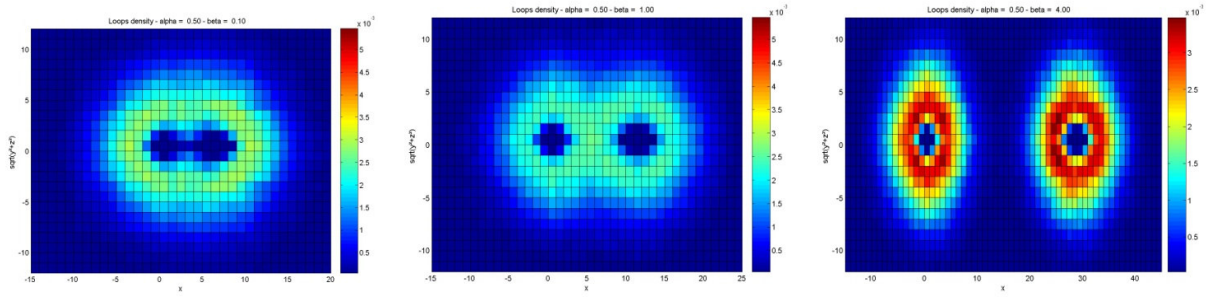

*Loops for  $\beta = \{0.1; 1; 4\}$*

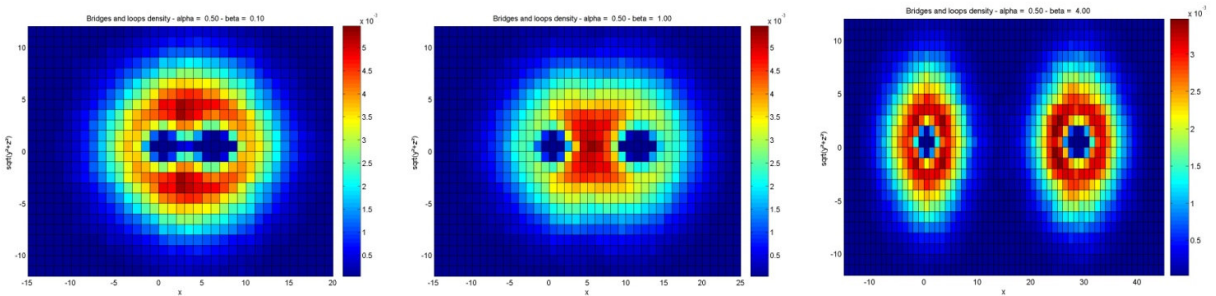

*Bridges+loops for  $\beta = \{0.1; 1; 4\}$*

Figure for supplementary information (Testard et al): Average monomer density  $\Phi(x, z)$  of ideal polymer chains having both stickers attached to a bead. Top line: bead size  $\alpha=0.5$ , at fixed distance  $\beta=1.5$ , for bridges, loops, and both; bottom three lines:  $\alpha=0.5$ , as a function of distance  $\beta=\{0.1; 1; 4\}$ .
